# Supplementary material for: One-Pot Thermal Synthesis of g-C3N4/ZnO Composites for the Degradation of 5-Fluoruracil Cytostatic Drug under UV-LED Irradiation
Source: MDPI journal article supplement (doi:10.3390/nano12030340), 2022-01-21
Supplement: s1 [file s1]

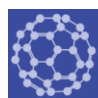

# One-Pot Thermal Synthesis of g-C<sub>3</sub>N<sub>4</sub>/ZnO Composites for the Degradation of 5-Fluoruracil Cytostatic Drug under UV-LED Irradiation

Álvaro Pérez-Molina, Luisa M. Pastrana-Martínez, Lorena T. Pérez-Poyatos, Sergio Morales-Torres\*, and Francisco J. Maldonado-Hódar

NanoTech—Nanomaterials and Sustainable Chemical Technologies, Department of Inorganic Chemistry, Faculty of Sciences, University of Granada; Avda. Fuente Nueva, s/n. ES18071 Granada, Spain; alpemo@ugr.es (Á.P.-M.); lpastrana@ugr.es (L.M.P.-M.); lorenaperez@correo.ugr.es (L.T.P.-P.); fjmaldon@ugr.es (F.J.M.-H.)

\* Correspondence: semoto@ugr.es; Tel.: +34-958248489

**Table S1.** Species percentages and corresponding binding energies (in brackets, eV) of pure CN, pristine ZnO and the different CN/ZnO composites determined by XPS analysis.

| Sample   | C1s (%)    |                    |            | O1s (%)                     |            |
|----------|------------|--------------------|------------|-----------------------------|------------|
|          | N-C=N      | C-(N) <sub>3</sub> | C-N-C      | O <sub>2</sub> <sup>-</sup> | O-H        |
| CN       | 12 (284.8) | 4 (286.2)          | 78 (288.2) | 60 (532.1)                  | 40 (533.3) |
| CN67/ZnO | 5 (284.3)  | 4 (286.3)          | 91 (288.2) | 71 (530.5)                  | 29 (532.8) |
| CN50/ZnO | 86 (284.8) | 4 (286.2)          | 10 (288.7) | 69 (530.5)                  | 31 (532.0) |
| CN25/ZnO | 85 (284.8) | 5 (286.1)          | 10 (288.8) | 68 (530.5)                  | 32 (532.2) |
| CN10/ZnO | 84 (284.8) | 5 (286.2)          | 11 (288.9) | 65 (530.6)                  | 35 (532.1) |
| ZnO      | –          | –                  | –          | 62 (529.8)                  | 38 (531.2) |

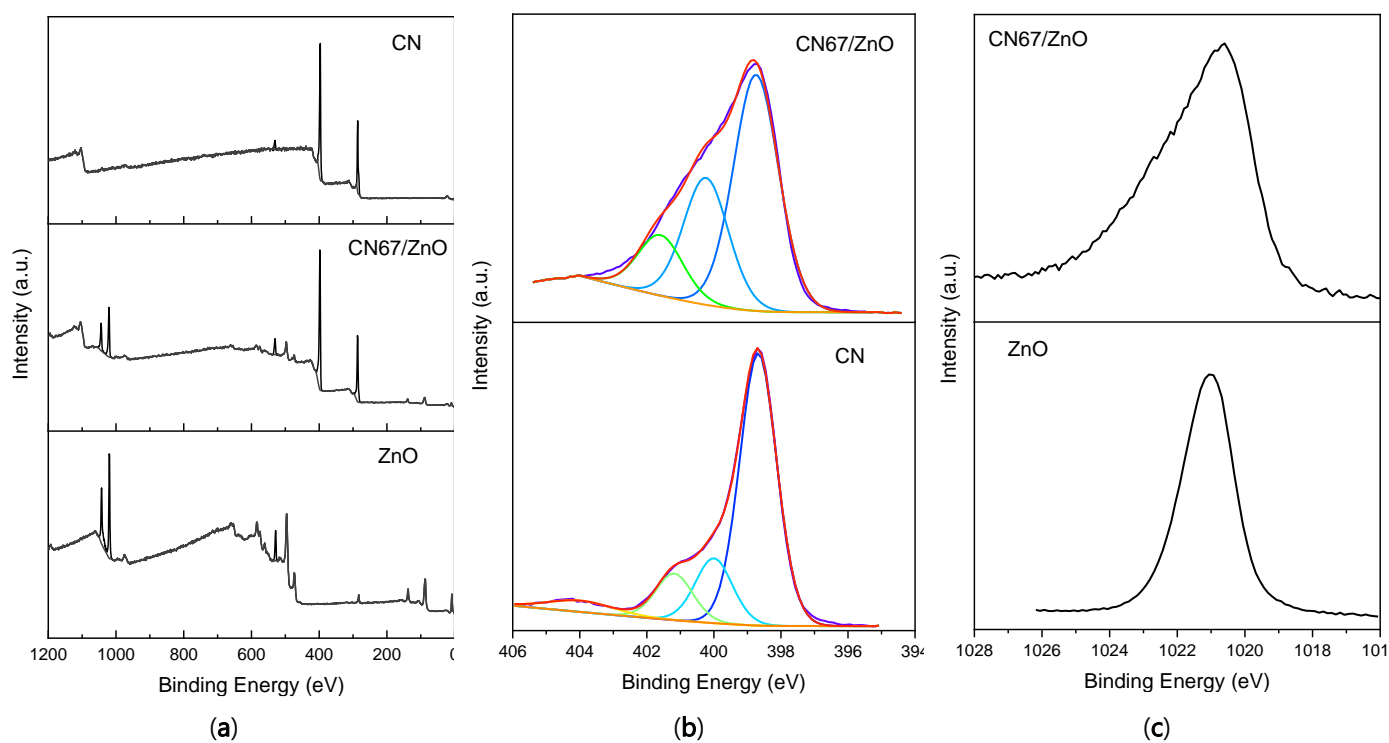

**Figure S1.** XPS spectra of pure CN, pristine ZnO and the CN67/ZnO composite: (a) survey, (b) N1s region and (c) Zn2p region.

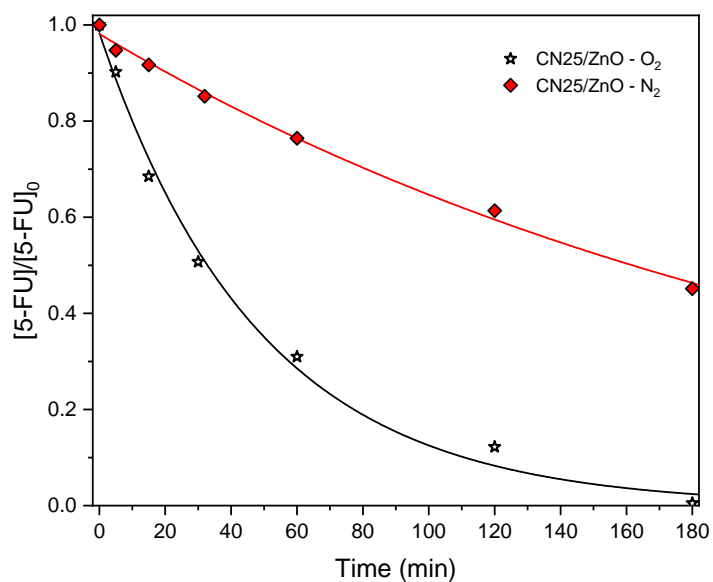

**Figure S2.** Photocatalytic degradation of 5-FU with different purge gas ( $O_2$  and  $N_2$ ) for the CN25/ZnO composite.
